# Supplementary material for: Methyltransferase‐like 14 suppresses growth and metastasis of renal cell carcinoma by decreasing long noncoding RNA NEAT1
Source: PubMed Central journal article supplement — Cancer Sci. 2021 Dec 16;113(2):446–58. doi: 10.1111/cas.15212 (PMC8819342; doi:10.1111/cas.15212), 2021-12-16
Supplement: CAS-113-446-s002.pdf [file CAS-113-446-s002.pdf]

**TABLE S1 Sequences of primers used for qRT-PCR in this study**

|                        |                           |
|------------------------|---------------------------|
| METTL14 Forward        | AGAAACTGCAGGGCTTCCT       |
| METTL14 Reverse        | TCTTCTTCATATGGCAAATTTTCTT |
| NEAT1 Forward          | GTGGCTGTTGGAGTCGGTAT      |
| NEAT1 Reverse          | TAACAAACCACGGTCCATGA      |
| NEAT1-2 Forward        | GGCCAGAGCTTTGTTGCTTC      |
| NEAT1-2 Reverse        | GGTGCGGGCACTTACTTACT      |
| YTHDF2 Forward         | TAGCCAGCTACAAGCACACCAC    |
| YTHDF2 Reverse         | CAACCGTTGCTGCAGTCTGTGT    |
| METTL3 Forward         | AAGCTGCACTTCAGACGAAT      |
| METTL3 Reverse         | GGAATCACCTCCGACACTC       |
| $\beta$ -actin Forward | AATCGTGCGTGACATTAAGGAG    |
| $\beta$ -actin Reverse | ACTGTGTTGGCGTACAGGTCTT    |

**TABLE S2 Sequences of primers used for siRNAs in this study**

|                              |                           |
|------------------------------|---------------------------|
| METTL14-1 sense              | GGACUUGGGAUGAUUUAUTT      |
| METTL14-1 antisense          | AUAAUAUCAUCCCAAGUCCTT     |
| METTL14-2 sense              | GGACUUCAUUCAUGC UAAUTT    |
| METTL14-2 antisense          | AUUAGCAUGAAUGAAGUCCTT     |
| NEAT1-1 sense                | GCCUAUCUAGUAUCUUAATT      |
| NEAT1-1 antisense            | GCCUAUCUAGUAUCUUAATT      |
| NEAT1-2 sense                | GTGGCTGTTGGAGTCGGTAT      |
| NEAT1-2 antisense            | TAACAAACCACGGTCCATGA      |
| YTHDF2 sense                 | CCAUGAUUGAUGGACAGUCAGCUUU |
| YTHDF2 antisense             | AAAGCUGACUGUCCAUAUCAUGG   |
| Negative control sense       | UUCUCCGAACGUGUCACGUTT     |
| Negative control antisense   | ACGUGACACGUUCGGAGAATT     |
| METTL3-1 targeting sequences | GCACTGGATCTACGGAAT        |
| METTL3-2 targeting sequences | CGACTACAGTAGCTGCCTT       |

**TABLE S3 Clinical characteristics analysis for 210 RCC patients according to METTL14 expression.**

| Variables       | Low METTL14<br>(n=105) | High METTL14<br>(n=105) | P value |
|-----------------|------------------------|-------------------------|---------|
| Gender          |                        |                         | 0.762   |
| Male            | 75                     | 73                      |         |
| Female          | 30                     | 32                      |         |
| Age (year)      |                        |                         | 0.555   |
| < 60            | 73                     | 69                      |         |
| ≥60             | 32                     | 36                      |         |
| Tumor size (cm) |                        |                         | < 0.001 |
| < 4cm           | 38                     | 72                      |         |
| ≥4cm            | 67                     | 33                      |         |
| Fuhrman grade   |                        |                         | 0.037   |
| I/II            | 65                     | 79                      |         |
| III/IV          | 40                     | 26                      |         |
| TNM stage       |                        |                         | 0.002   |
| I/II            | 67                     | 87                      |         |
| III/IV          | 38                     | 18                      |         |
| Metastasis      |                        |                         | < 0.001 |
| No              | 70                     | 90                      |         |
| Yes             | 35                     | 15                      |         |
